# Supplementary material for: Evidence that levels of nine essential metals in post-mortem human-Alzheimer’s-brain andex vivorat-brain tissues are unaffected by differences in post-mortem delay, age, disease staging, and brain bank location
Source: Royal Society of Chemistry journal article supplement (doi:10.1039/d0mt00048e), 2020-04-23
Supplement: d0mt00048e1.pdf [file d0mt00048e1.pdf]

# Supplementary Material A

Supplementary Table 1: Characteristics of individuals in the Manchester cohort

| Code | Sex | Age at death | Clinical diagnosis  | Braak stage (AD) | APOE Status | Post-Mortem Delay (hours) | Whole-brain weight (g) | Brain pH | Cause of Death |
|------|-----|--------------|---------------------|------------------|-------------|---------------------------|------------------------|----------|----------------|
| AD1  | M   | 88           | Alzheimer's Disease | V                | 3/4         | 75                        | 1027                   | NA       | NA             |
| AD2  | M   | 69           | Alzheimer's disease | VI               | 3/3         | 96                        | 1160†                  | NA       | NA             |
| AD3  | M   | 65           | Alzheimer's disease | VI               | 3/3         | 72*                       | NA                     | NA       | NA             |
| AD4  | F   | 61           | Alzheimer's disease | VI               | 3/4         | 130                       | 1120                   | NA       | NA             |
| AD5  | F   | 89           | Alzheimer's disease | V-VI             | 3/3         | 72                        | NA                     | NA       | NA             |
| AD6  | M   | 76           | Alzheimer's disease | V-VI             | 3/4         | 96*                       | 1359                   | NA       | NA             |
| AD7  | M   | 83           | Alzheimer's disease | IV-V             | 3/3         | 96                        | 1046†                  | NA       | NA             |
| AD8  | F   | 88           | Alzheimer's disease | VI               | 3/3         | 72                        | 900†                   | NA       | NA             |

|     |   |    |                              |      |     |      |                   |      |                                                                                            |
|-----|---|----|------------------------------|------|-----|------|-------------------|------|--------------------------------------------------------------------------------------------|
| AD9 | M | 87 | Alzheimer's disease          | IV   | 3/4 | 49   | 1066              | NA   | NA                                                                                         |
| C1  | F | 92 | No dementia or brain disease | II   | 3/4 | 37   | 1080 <sup>†</sup> | NA   | Myocardial infarction                                                                      |
| C2  | F | 87 | No dementia or brain disease | I-II | 3/3 | 39   | 1160 <sup>†</sup> | NA   | Anteroseptal myocardial infarction; coronary atherosclerosis; left ventricular hypertrophy |
| C3  | M | 89 | No dementia or brain disease | II   | 3/3 | 27   | 1400 <sup>†</sup> | NA   | Multi-organ failure, septicaemia, cellulitis, heart failure                                |
| C4  | M | 95 | No dementia or brain disease | I-II | 3/3 | 12   | 1200 <sup>†</sup> | NA   | Prostatic carcinoma                                                                        |
| C5  | F | 87 | No dementia or brain disease | 0-I  | 3/4 | 24   | 1152              | NA   | Cardiac failure, COPD, renal impairment, osteoarthritis                                    |
| C6  | M | 84 | No dementia or brain         | I    | 3/3 | 69.5 | 1494              | 5.84 | NA                                                                                         |

|    |   |    | disease                      |      |     |    |       |      |                           |
|----|---|----|------------------------------|------|-----|----|-------|------|---------------------------|
| C7 | F | 90 | No dementia or brain disease | 0-I  | 3/3 | 39 | 1050  | NA   | Frailty of old age        |
| C8 | F | 82 | No dementia or brain disease | 0-I  | 3/3 | 61 | 1020† | NA   | Metastatic ovarian cancer |
| C9 | F | 94 | No dementia or brain disease | I-II | 3/3 | 70 | 1276  | 5.87 | Carcinoma of the appendix |

\*Estimated PMD (provided by the Manchester Brain Bank); †brain weighed at point of fixation by brain bank. Abbreviation: NA, not available

Supplementary Table 2: Characteristics of individuals in the Auckland cohort

| Code | Sex | Age at death | Clinical diagnosis  | Braak stage (AD) | APOE Status | Post-Mortem Delay (hours) | Whole-brain weight (g) | Brain pH | Cause of Death                     |
|------|-----|--------------|---------------------|------------------|-------------|---------------------------|------------------------|----------|------------------------------------|
| AD19 | M   | 60           | Alzheimer's Disease | 6                | NA          | 7.0                       | 1020                   | 7.0      | Alzheimer's disease                |
| AD20 | F   | 62           | Alzheimer's disease | 6                | NA          | 6.0                       | 831                    | 6.0      | Alzheimer's disease                |
| AD21 | F   | 63           | Alzheimer's disease | 6                | NA          | 7.0                       | 1080                   | 7.0      | Bronchopneumonia                   |
| AD22 | F   | 70           | Alzheimer's disease | 5                | NA          | 7.0                       | 1044                   | 7.0      | Lung cancer                        |
| AD23 | M   | 73           | Alzheimer's disease | 4                | NA          | 4.0                       | 1287                   | 4.0      | GI haemorrhage                     |
| AD24 | F   | 74           | Alzheimer's disease | 5                | NA          | 8.5                       | 1062                   | 8.5      | Metastatic cancer                  |
| AD25 | M   | 74           | Alzheimer's disease | 6                | NA          | 12.0                      | 1355                   | 12.0     | Pseudomonas bacteraemia            |
| AD26 | M   | 77           | Alzheimer's disease | 6                | NA          | 4.5                       | 1180                   | 4.5      | Myocardial infarction              |
| AD27 | M   | 80           | Alzheimer's disease | 5                | NA          | 5.5                       | 1039                   | 5.5      | Bronchopneumonia/ pulmonary oedema |

|     |   |    |                              |   |    |      |      |      |                          |
|-----|---|----|------------------------------|---|----|------|------|------|--------------------------|
| C19 | M | 61 | No dementia or brain disease | 0 | NA | 7.0  | 1258 | 7.0  | Ischaemic heart disease  |
| C20 | F | 64 | No dementia or brain disease | 0 | NA | 5.5  | 1260 | 5.5  | Pulmonary embolism       |
| C21 | F | 63 | No dementia or brain disease | 0 | NA | 12.0 | 1280 | 12.0 | Ruptured aorta           |
| C22 | F | 72 | No dementia or brain disease | 0 | NA | 9.0  | 1230 | 9.0  | Emphysema                |
| C23 | M | 66 | No dementia or brain disease | 0 | NA | 9.0  | 1461 | 9.0  | Ischaemic heart disease  |
| C24 | F | 76 | No dementia or brain disease | 2 | NA | 12.0 | 1094 | 12.0 | Metastatic carcinoma     |
| C25 | M | 73 | No dementia or brain disease | 0 | NA | 13.0 | 1315 | 13.0 | Ischaemic heart disease  |
| C26 | M | 78 | No dementia or brain disease | 0 | NA | 7.5  | 1260 | 7.5  | Ruptured aortic aneurysm |
| C27 | M | 78 | No dementia or brain disease | 0 | NA | 12.0 | 1416 | 12.0 | Ruptured MI              |

Abbreviation: NA = Not available

Supplementary Table 3: PMD, Braak stage and age of all brains listed in databases of the Manchester brain bank

| Variable    |            | Manchester Samples      |                           |
|-------------|------------|-------------------------|---------------------------|
| PMD†        |            | 82 (4-279) <sup>1</sup> |                           |
| Braak Stage | 0          | I/II                    | P-Value                   |
| Age†        | 68 (44-90) | 85 (55-103)             | 1.4x10 <sup>-6</sup> **** |

Values are mean (range). † Data taken from all individuals in database, irrespective of diagnosis. <sup>1</sup>Data obtained from MRC Brain Bank database on 07/06/2019 from 420 cases with available PMD data; data unavailable for 20 individuals. \*\*\*\* p < 0.0001

Supplementary Table 4: Characteristics of Manchester experimental cohort

| Variable                 | Controls           | AD Cases          |
|--------------------------|--------------------|-------------------|
| Number                   | 9                  | 9                 |
| Age                      | 89 (82-95)         | 83 (61-89)*       |
| Male Sex, n (%)          | 6 (66.7)           | 3 (33.3)          |
| Braak Stage              | I-II               | IV-V****          |
| PMD (hours)              | 75 (49 – 130)      | 39 (12 – 70)***   |
| Whole-brain weight (g) † | 1160 (1020 – 1494) | 1066 (900 – 1359) |

Values are: age, PMD, Braak stage, and whole-brain weight median (range); \*  $p < 0.05$ , \*\*\*  $p < 0.001$ , \*\*\*\*  $p < 0.0001$ . †

Whole-brain weights were unavailable for two AD cases.

Supplementary Table 5: Characteristics of Auckland experimental cohort

| Variable                 | Controls          | AD Cases           |
|--------------------------|-------------------|--------------------|
| Number                   | 9                 | 9                  |
| Age                      | 72 (61 - 78)      | 73 (60 - 80)       |
| Male Sex, n (%)          | 5 (55.6)          | 5 (55.6)           |
| Braak Stage              | 0 (0 - II)****    | VI (IV - VI)       |
| PMD (hours)              | 9 (7 - 13)*       | 7 (4 - 12)         |
| Whole-brain weight (g) † | 1062 (831 - 1355) | 1260 (1094 - 1461) |
| Brain pH                 | 7.0 (4.0 - 12)*   | 9.0 (5.5 - 13.0)   |

Values are: age, PMD, Braak stage, pH, and whole brain weight median (range); \*  $p < 0.05$ , \*\*\*\*  $p < 0.0001$ .

Abbreviations: PMD, post-mortem delay.

Comment [GC]: I take it that CERAD criteria weren't available for the Manchester cases?

Comment [GC]:
